# Supplementary material for: Risk Factors of Pertussis Among Older Adults in South Korea: A Nationwide Health Data-Based Case–Control Study
Source: PubMed Central journal article supplement — Infect Dis Ther. 2023 Jan 2;12(2):545–61. doi: 10.1007/s40121-022-00747-0 (PMC9925654; doi:10.1007/s40121-022-00747-0), 2023-01-02
Supplement: 40121_2022_747_MOESM1_ESM.pdf [file 40121_2022_747_MOESM1_ESM.pdf]

# **Risk Factors of Pertussis Among Older Adults in South Korea: A Nationwide Health Data-Based Case-Control Study**

Hyungwoo Kim (ORCID: 0000-0001-8675-0192)<sup>1</sup>, Ju-Young Shin (ORCID: 0000-0003-1010-7525)<sup>2,3</sup>, Jing Chen (ORCID: 0000-0002-7611-4173)<sup>4</sup>, Ju Hwan Kim (ORCID: 0000-0001-7253-6515)<sup>2</sup>, Yunha Noh (ORCID: 0000-0002-3645-7358)<sup>2</sup>, Hee Jin Cheong (ORCID: 0000-0002-2532-1463)<sup>5</sup>, Yeon-Mok Oh (ORCID: 0000-0003-0116-4683)<sup>6</sup>, Adrienne Guignard (ORCID: 0000-0002-3899-6902)<sup>7</sup>, Sumitra Shantakumar (ORCID: 0000-0001-5814-6465)<sup>4</sup>

<sup>1</sup>GSK, Seoul, South Korea

<sup>2</sup>School of Pharmacy, Sungkyunkwan University, Suwon, South Korea

<sup>3</sup>Department of Clinical Research Design & Evaluation, Samsung Advanced Institute for Health Sciences & Technology, Sungkyunkwan University, Seoul, South Korea

<sup>4</sup>GSK, Singapore, Singapore

<sup>5</sup>Department of Internal Medicine, Korea University College of Medicine, Seoul, South Korea

<sup>6</sup>Department of Pulmonology and Critical Care Medicine, University of Ulsan College of Medicine, Asan Medical Center, Seoul, South Korea

<sup>7</sup>GSK, Wavre, Belgium

**Correspondence to:** Professor Ju-Young Shin

Email: shin.jy@skku.edu

School of Pharmacy, Sungkyunkwan University, Seobu-ro 2066, Jangan-gu, Suwon, Gyeonggi-do 440-746, Korea.

**SUPPLEMENTARY DATA**

**Supplementary Figure 1. Overview of sensitivity analysis**

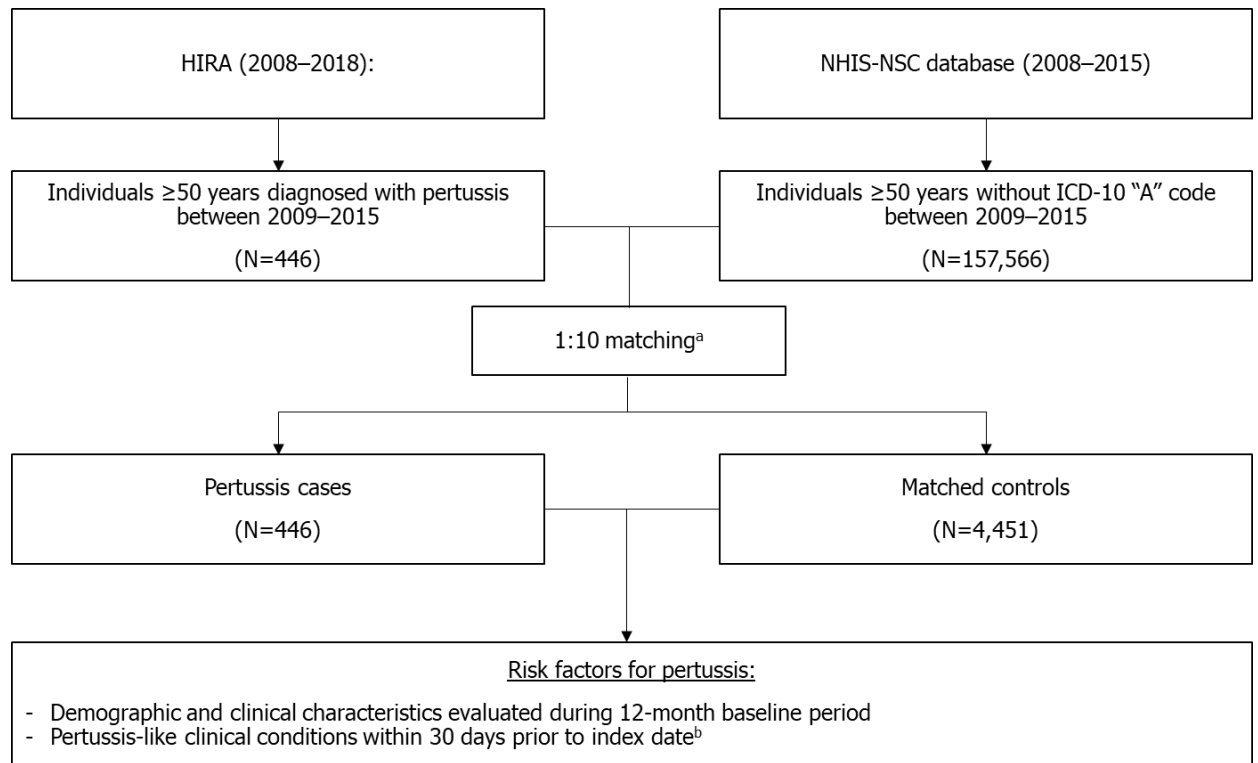

[a] Matching was based on age group (5-year band), sex, and geographic location; [b] Includes acute bronchitis, allergic rhinitis, pneumonia and URTI. HIRA: Health Insurance Review and Assessment service; ICD-10: International Statistical Classification of Diseases and Related Health Problems 10th Edition; NHIS-NSC: National Health Insurance Service – National Sample Cohort; URTI: upper respiratory tract infection.

**Supplementary Table 1. ICD-10 and ATC codes used for data analysis**

| <b>Variables</b>                               | <b>ICD-10 code or ATC code</b>                                                                 |
|------------------------------------------------|------------------------------------------------------------------------------------------------|
| <i>Comorbidities</i>                           |                                                                                                |
| Asthma                                         | J45-J46                                                                                        |
| Cancer                                         | C00-C43, C45-C97                                                                               |
| Cardiovascular disease                         | I110, I20-I25, I42-I50, I130, I132, I70, I72, I73, I74, I77, E115, E145, E135, K550, K551, J81 |
| Cerebrovascular disease                        | I60-I69, G45(excl. G454), G46                                                                  |
| COPD                                           | J43-J44                                                                                        |
| Diabetes                                       | E10-E14                                                                                        |
| GERD                                           | K21                                                                                            |
| Hyperlipidemia                                 | E78.0-E78.5                                                                                    |
| Hypertension                                   | I10-I15                                                                                        |
| Autoimmune disease                             | D59, D89, K50-K51, L40, M32-M35, M45, M79                                                      |
| Liver disease                                  | B18, I85.x, I86.4, I98.2, K70-K77, Z94.4                                                       |
| Renal disease                                  | E112, E132, E142, I12, I13, N00-N08, N17, N18, N19, N25-N27, Z49.0-Z49.2, Z94.0, Z99.2         |
| <i>Pertussis-like clinical conditions</i>      |                                                                                                |
| Acute bronchitis                               | J20-J22                                                                                        |
| Allergic rhinitis                              | J30                                                                                            |
| Pneumonia                                      | J13-J18                                                                                        |
| URTI                                           | J00-J06                                                                                        |
| <i>Medication prescriptions</i>                |                                                                                                |
| immunosuppressants (excluding corticosteroids) | L04A                                                                                           |
| Cough suppressants                             | R05DA09, R05DB01, R05DB27, R05DB15, R05DA04, N02AA08, R05CA03                                  |
| Antibiotics                                    | J01A, J01B, J01C, J01D, J01E, J01F, J01G, J01M, J01R, J01X, S01A                               |

ATC: Anatomical Therapeutic Chemical; COPD: chronic obstructive pulmonary disease; GERD: Gastro-esophageal reflux disease; ICD-10: International Classification of Diseases, 10<sup>th</sup> revision; URTI: Upper respiratory tract infection.

**Supplementary Table 2. Multivariate logistic regression analysis of potential risk factors for pertussis among individuals aged between 50–64 years between 2009–2018**

|                                                                              | Odds ratio (95% CI) |                         |
|------------------------------------------------------------------------------|---------------------|-------------------------|
|                                                                              | Crude               | Adjusted <sup>a</sup>   |
| <b>Respiratory conditions within 12 months prior to index date</b>           |                     |                         |
| Asthma                                                                       | 7.03 (5.71–8.65)    | <b>1.87 (1.41–2.48)</b> |
| COPD                                                                         | 6.25 (3.84–10.18)   | <b>2.24 (1.18–4.29)</b> |
| <b>Pertussis-like clinical conditions within 30 days prior to index date</b> |                     |                         |
| Acute bronchitis                                                             | 19.58 (15.83–24.21) | <b>5.08 (3.80–6.80)</b> |
| Allergic rhinitis                                                            | 14.09 (11.34–17.50) | <b>1.44 (1.04–1.99)</b> |
| Pneumonia                                                                    | 43.04 (25.76–71.91) | <b>5.24 (2.86–9.62)</b> |
| URTI                                                                         | 13.37 (10.93–16.34) | <b>3.08 (2.32–4.09)</b> |
| <b>Other medical conditions within 12 months prior to index date</b>         |                     |                         |
| Cancer                                                                       | 1.90 (1.30–2.77)    | 1.24 (0.77–1.98)        |
| Cardiovascular disease                                                       | 2.30 (1.87–2.85)    | 1.22 (0.90–1.64)        |
| Cerebrovascular disease                                                      | 1.64 (1.12–2.40)    | 1.11 (0.70–1.08)        |
| Diabetes                                                                     | 1.67 (1.33–2.09)    | 0.82 (0.60–1.12)        |
| GERD                                                                         | 5.06 (4.22–6.07)    | <b>2.44 (1.94–3.07)</b> |
| Hyperlipidemia                                                               | 2.53 (2.11–3.03)    | <b>1.39 (1.06–1.83)</b> |
| Hypertension                                                                 | 1.43 (1.19–1.72)    | 0.79 (0.61–1.02)        |
| Autoimmune disease                                                           | 3.37 (2.82–4.03)    | <b>1.56 (1.24–1.95)</b> |
| Liver disease                                                                | 2.47 (2.02–3.02)    | 1.14 (0.86–1.51)        |
| Renal disease                                                                | 2.04 (1.40–2.98)    | 1.27 (0.77–2.10)        |
| <b>Co-medications within 12 months prior to index date</b>                   |                     |                         |
| Immunosuppressive drugs (excluding corticosteroids)                          | 4.50 (2.38–8.51)    | 1.46 (0.61–3.52)        |

558 pertussis cases and 5,452 matched controls were included in this analysis. [a] The multivariate model adjusted for each of the characteristics, including comorbidities, co-medications assessed within 12 months prior to index date and pertussis-like clinical conditions assessed within 30 days of index date. Significant values ( $p < 0.05$ ) are shown in bold. CI: confidence interval; COPD: chronic obstructive pulmonary disease; GERD: gastroesophageal reflux disease; URTI: upper respiratory tract infection.

**Supplementary Table 3. Multivariate logistic regression analysis of potential risk factors for pertussis among individuals aged ≥65 years between 2009–2018**

|                                                                              | Odds ratio (95% CI)   |                           |
|------------------------------------------------------------------------------|-----------------------|---------------------------|
|                                                                              | Crude                 | Adjusted <sup>a</sup>     |
| <b>Respiratory conditions within 12 months prior to index date</b>           |                       |                           |
| Asthma                                                                       | 13.06 (10.38–16.43)   | <b>2.34 (1.65–3.30)</b>   |
| COPD                                                                         | 10.57 (7.64–14.62)    | <b>2.18 (1.32–3.63)</b>   |
| <b>Pertussis-like clinical conditions within 30 days prior to index date</b> |                       |                           |
| Acute bronchitis                                                             | 32.68 (25.03–42.68)   | <b>4.44 (2.98–6.62)</b>   |
| Allergic rhinitis                                                            | 31.47 (23.93–41.37)   | <b>2.19 (1.41–3.41)</b>   |
| Pneumonia                                                                    | 145.53 (70.20–301.69) | <b>17.39 (7.38–40.98)</b> |
| URTI                                                                         | 19.74 (15.36–25.37)   | <b>2.64 (1.74–4.00)</b>   |
| <b>Other medical conditions within 12 months prior to index date</b>         |                       |                           |
| Cancer                                                                       | 5.82 (4.21–8.05)      | <b>2.35 (1.50–3.66)</b>   |
| Cardiovascular disease                                                       | 7.23 (5.89–8.87)      | <b>2.10 (1.52–2.89)</b>   |
| Cerebrovascular disease                                                      | 3.34 (2.57–4.34)      | 1.03 (0.71–1.50)          |
| Diabetes                                                                     | 4.68 (3.80–5.76)      | 1.00 (0.73–1.38)          |
| GERD                                                                         | 11.32 (9.16–13.99)    | <b>2.87 (2.15–3.84)</b>   |
| Hyperlipidemia                                                               | 6.66 (5.43–8.17)      | <b>1.55 (1.12–2.16)</b>   |
| Hypertension                                                                 | 6.10 (4.92–7.54)      | 1.30 (0.93–1.81)          |
| Autoimmune disease                                                           | 6.95 (5.66–8.52)      | <b>1.34 (1.00–1.80)</b>   |
| Liver disease                                                                | 5.97 (4.80–7.43)      | 1.03 (0.74–1.44)          |
| Renal disease                                                                | 5.21 (3.78–7.18)      | <b>1.75 (1.11–2.77)</b>   |
| <b>Co-medications within 12 months prior to index date</b>                   |                       |                           |
| Immunosuppressive drugs (excluding corticosteroids)                          | 8.95 (3.93–20.40)     | <b>3.82 (1.24–11.75)</b>  |

446 pertussis cases and 4,258 matched controls were included. [a] The multivariate model adjusted for each of the characteristics, including comorbidities, co-medications assessed within 12 months prior to index date and pertussis-like clinical conditions assessed within 30 days of index date. Significant values ( $p < 0.05$ ) are shown in bold. CI: confidence interval; COPD: chronic obstructive pulmonary disease; GERD: gastroesophageal reflux disease; URTI: upper respiratory tract infection.

**Supplementary Table 4. Baseline characteristics of pertussis cases after matching data period between HIRA data and NHIS-NSC (2009–2015) (Sensitivity analysis)**

|                                                                              | Pertussis <sup>a</sup><br>(n=446) |      | Control <sup>b</sup><br>(n=4,451) |      | Overall<br>(n=4,897) |      |
|------------------------------------------------------------------------------|-----------------------------------|------|-----------------------------------|------|----------------------|------|
|                                                                              | n                                 | %    | n                                 | %    | n                    | %    |
| <b>Age</b>                                                                   |                                   |      |                                   |      |                      |      |
| Mean (SD)                                                                    | 60.6 (8.5)                        |      | 60.8 (8.6)                        |      | 60.7 (8.6)           |      |
| 50–54                                                                        | 128                               | 28.7 | 1,279                             | 28.7 | 1,407                | 28.7 |
| 55–59                                                                        | 111                               | 24.9 | 1,110                             | 24.9 | 1,221                | 24.9 |
| 60–64                                                                        | 74                                | 16.6 | 739                               | 16.6 | 813                  | 16.6 |
| 65–69                                                                        | 58                                | 13.0 | 580                               | 13.0 | 638                  | 13.0 |
| 70–74                                                                        | 40                                | 9.0  | 400                               | 9.0  | 440                  | 9.0  |
| 75+                                                                          | 35                                | 7.9  | 343                               | 7.7  | 378                  | 7.7  |
| <b>Sex</b>                                                                   |                                   |      |                                   |      |                      |      |
| Female                                                                       | 294                               | 65.9 | 2,939                             | 66.0 | 3,233                | 66.0 |
| Male                                                                         | 152                               | 34.1 | 1,512                             | 34.0 | 1,664                | 34.0 |
| <b>Region</b>                                                                |                                   |      |                                   |      |                      |      |
| Metropolitan                                                                 | 130                               | 29.2 | 1,300                             | 29.2 | 1,430                | 29.2 |
| Urban area                                                                   | 214                               | 48.0 | 2,131                             | 47.9 | 2,345                | 47.9 |
| Rural area                                                                   | 102                               | 22.9 | 1,020                             | 22.9 | 1,122                | 22.9 |
| <b>Comorbidities within 12 months prior to index date</b>                    |                                   |      |                                   |      |                      |      |
| Asthma                                                                       | 112                               | 25.1 | 515                               | 11.6 | 627                  | 12.8 |
| Cancer                                                                       | 27                                | 6.1  | 247                               | 5.6  | 274                  | 5.6  |
| Cardiovascular disease                                                       | 123                               | 27.6 | 1,077                             | 24.2 | 1,200                | 24.5 |
| Cerebrovascular disease                                                      | 34                                | 7.6  | 401                               | 9.0  | 435                  | 8.9  |
| COPD                                                                         | 27                                | 6.1  | 108                               | 2.4  | 135                  | 2.8  |
| Diabetes                                                                     | 91                                | 20.4 | 1,062                             | 23.9 | 1,153                | 23.6 |
| GERD                                                                         | 189                               | 42.4 | 1,179                             | 26.5 | 1,368                | 27.9 |
| Hyperlipidemia                                                               | 168                               | 37.7 | 1,583                             | 35.6 | 1,751                | 35.8 |
| Hypertension                                                                 | 198                               | 44.4 | 2,109                             | 47.4 | 2,307                | 47.1 |
| Autoimmune disease                                                           | 179                               | 40.1 | 1,513                             | 34.0 | 1,692                | 34.6 |
| Liver disease                                                                | 117                               | 26.2 | 1,010                             | 22.7 | 1,127                | 23.0 |
| Renal disease                                                                | 24                                | 5.4  | 257                               | 5.8  | 281                  | 5.7  |
| <b>Co-medications</b>                                                        |                                   |      |                                   |      |                      |      |
| Immunosuppressive drugs<br>(excluding corticosteroids)                       | 5                                 | 1.1  | 33                                | 0.7  | 38                   | 0.8  |
| <b>Pertussis-like clinical conditions within 30 days prior to index date</b> |                                   |      |                                   |      |                      |      |
| Acute bronchitis                                                             | 184                               | 41.3 | 336                               | 7.6  | 520                  | 10.6 |
| Allergic rhinitis                                                            | 124                               | 27.8 | 320                               | 7.2  | 444                  | 9.1  |
| Pneumonia                                                                    | 36                                | 8.1  | 27                                | 0.6  | 63                   | 1.3  |
| URTI                                                                         | 183                               | 41.0 | 465                               | 10.5 | 648                  | 13.2 |

Each pertussis case was matched up to 10 controls by age group, sex, and geographic region at index date. [a] Among 1,011 cases, 7 cases were not matched with at least one control. [b] Due to limited available data period of NHIS-NSC, controls in 2015 were matched with the cases diagnosed between 2015 and 2018. COPD: chronic obstructive pulmonary disease; GERD: gastroesophageal reflux disease; HIRA: Health Insurance Review and Assessment service; SD: standard deviation; NHIS-NSC: National Health Insurance Service – National Sample Cohort; URTI: upper respiratory tract infection.

**Supplementary Table 5. Multivariate logistic regression analysis of potential risk factors for pertussis among individuals 50–64 years after matching data period between HIRA data and NHIS-NSC (2009–2015; sensitivity analysis)**

|                                                                              | Odds ratio (95% CI) |                         |
|------------------------------------------------------------------------------|---------------------|-------------------------|
|                                                                              | Crude               | Adjusted <sup>a</sup>   |
| <b>Respiratory conditions within 12 months prior to index date</b>           |                     |                         |
| Asthma                                                                       | 2.65 (1.99–3.51)    | <b>1.39 (1.00–1.95)</b> |
| COPD                                                                         | 2.93 (1.53–5.63)    | <b>2.43 (1.13–5.20)</b> |
| <b>Pertussis-like clinical conditions within 30 days prior to index date</b> |                     |                         |
| Acute bronchitis                                                             | 9.31 (7.17–12.09)   | <b>4.90 (3.53–6.79)</b> |
| Allergic rhinitis                                                            | 5.28 (3.99–6.99)    | 1.00 (0.69–1.46)        |
| Pneumonia                                                                    | 12.38 (6.62–23.13)  | <b>3.45 (1.66–7.16)</b> |
| URTI                                                                         | 6.61 (5.14–8.50)    | <b>3.02 (2.21–4.14)</b> |
| <b>Other medical conditions within 12 months prior to index date</b>         |                     |                         |
| Cancer                                                                       | 1.05 (0.63–1.76)    | 1.03 (0.58–1.82)        |
| Cardiovascular disease                                                       | 1.07 (0.80–1.43)    | 1.18 (0.84–1.67)        |
| Cerebrovascular disease                                                      | 0.67 (0.67–1.21)    | 0.69 (0.36–1.33)        |
| Diabetes                                                                     | 0.69 (0.50–0.95)    | 0.62 (0.42–0.91)        |
| GERD                                                                         | 1.94 (1.53–2.48)    | <b>1.59 (1.21–2.09)</b> |
| Hyperlipidemia                                                               | 1.06 (0.83–1.35)    | 1.06 (0.77–1.46)        |
| Hypertension                                                                 | 0.87 (0.68–1.10)    | 0.90 (0.67–1.20)        |
| Autoimmune disease                                                           | 1.35 (1.06–1.71)    | 1.02 (0.78–1.34)        |
| Liver disease                                                                | 1.12 (0.86–1.48)    | 1.08 (0.78–1.51)        |
| Renal disease                                                                | 0.82 (0.46–1.45)    | 0.87 (0.45–1.68)        |
| <b>Co-medications within 12 months prior to index date</b>                   |                     |                         |
| Immunosuppressive drugs (excluding corticosteroids)                          | 1.54 (0.54–4.45)    | 1.33 (0.41–4.28)        |

239 pertussis cases and 2,389 matched controls were included in this analysis. [a] The multivariate model adjusted for each of the characteristics, including comorbidities, co-medications assessed within 12 months prior to index date and pertussis-like clinical conditions assessed within 30 days of index date. Significant values ( $p < 0.05$ ) are shown in bold. CI: confidence interval; COPD: chronic obstructive pulmonary disease; GERD: gastroesophageal reflux disease; HIRA: Health Insurance Review and Assessment service; NHIS-NSC: National Health Insurance Service – National Sample Cohort; URTI: upper respiratory tract infection.

**Supplementary Table 6. Multivariate logistic regression analysis of potential risk factors for pertussis among individuals ≥65 years after matching data period between HIRA data and NHIS-NSC (2009–2015; sensitivity analysis)**

|                                                                              | Odds ratio (95% CI) |                          |
|------------------------------------------------------------------------------|---------------------|--------------------------|
|                                                                              | Crude               | Adjusted <sup>a</sup>    |
| <b>Respiratory conditions within 12 months prior to index date</b>           |                     |                          |
| Asthma                                                                       | 2.42 (1.60–3.64)    | 1.46 (0.89–2.38)         |
| COPD                                                                         | 2.42 (1.34–4.38)    | 1.97 (0.98–3.95)         |
| <b>Pertussis-like clinical conditions within 30 days prior to index date</b> |                     |                          |
| Acute bronchitis                                                             | 7.14 (4.78–10.68)   | <b>4.39 (2.59–7.43)</b>  |
| Allergic rhinitis                                                            | 4.29 (2.76–6.67)    | 0.89 (0.48–1.63)         |
| Pneumonia                                                                    | 19.34 (7.95–47.03)  | <b>7.74 (2.88–20.80)</b> |
| URTI                                                                         | 4.66 (3.14–6.91)    | <b>2.34 (1.37–4.00)</b>  |
| <b>Other medical conditions within 12 months prior to index date</b>         |                     |                          |
| Cancer                                                                       | 1.18 (0.60–2.34)    | 1.16 (0.55–2.44)         |
| Cardiovascular disease                                                       | 1.44 (1.01–2.06)    | <b>1.60 (1.03–2.47)</b>  |
| Cerebrovascular disease                                                      | 0.97 (0.60–1.56)    | 0.98 (0.57–1.69)         |
| Diabetes                                                                     | 1.04 (0.72–1.52)    | 0.76 (0.48–1.21)         |
| GERD                                                                         | 2.31 (1.61–3.31)    | <b>1.94 (1.29–2.91)</b>  |
| Hyperlipidemia                                                               | 1.18 (0.82–1.69)    | 1.01 (0.64–1.59)         |
| Hypertension                                                                 | 0.91 (0.63–1.31)    | 0.76 (0.49–1.18)         |
| Autoimmune disease                                                           | 1.20 (0.84–1.73)    | 0.75 (0.49–1.14)         |
| Liver disease                                                                | 1.42 (0.96–2.09)    | 1.09 (0.68–1.77)         |
| Renal disease                                                                | 1.12 (0.58–2.14)    | 0.93 (0.43–2.03)         |
| <b>Co-medications within 12 months prior to index date</b>                   |                     |                          |
| Immunosuppressive drugs (excluding corticosteroids)                          | 1.43 (0.17–11.67)   | 2.49 (0.29–21.61)        |

207 pertussis cases and 2,062 matched controls were included in this analysis. [a] The multivariate model adjusted for each of the characteristics, including comorbidities, co-medications assessed within 12 months prior to index date and pertussis-like clinical conditions assessed within 30 days of index date. Significant values ( $p < 0.05$ ) are shown in bold. CI: confidence interval; COPD: chronic obstructive pulmonary disease; GERD: gastroesophageal reflux disease; HIRA: Health Insurance Review and Assessment service; NHIS-NSC: National Health Insurance Service – National Sample Cohort; URTI: upper respiratory tract infection.



**Supplementary Table 7. Baseline characteristics and multivariate logistic regression analysis of potential risk factors for pertussis between 2009–2018 (sensitivity analysis using separate models for chronic and acute medical events)**

|                                                                              | Pertussis <sup>a</sup><br>(n=1,004) |      | Control <sup>b</sup><br>(n=9,710) |      | Adjusted odds ratio (95% CI) <sup>c</sup> |   |
|------------------------------------------------------------------------------|-------------------------------------|------|-----------------------------------|------|-------------------------------------------|---|
|                                                                              | n                                   | %    | n                                 | %    |                                           |   |
| <b>Age</b>                                                                   |                                     |      |                                   |      |                                           |   |
| Mean (SD)                                                                    | 64.2 (10.4)                         |      | 65.0 (10.6)                       |      |                                           |   |
| 50–54                                                                        | 214                                 | 21.3 | 2,112                             | 21.8 | -                                         | - |
| 55–59                                                                        | 195                                 | 19.4 | 1,916                             | 19.7 | -                                         | - |
| 60–64                                                                        | 149                                 | 14.8 | 1,424                             | 14.7 | -                                         | - |
| 65–69                                                                        | 137                                 | 13.7 | 1,300                             | 13.4 | -                                         | - |
| 70–74                                                                        | 106                                 | 10.6 | 996                               | 10.3 | -                                         | - |
| 75+                                                                          | 203                                 | 20.2 | 1,962                             | 20.2 | -                                         | - |
| <b>Sex</b>                                                                   |                                     |      |                                   |      |                                           |   |
| Female                                                                       | 614                                 | 61.2 | 5,968                             | 61.5 | -                                         | - |
| Male                                                                         | 390                                 | 38.8 | 3,742                             | 38.5 | -                                         | - |
| <b>Region</b>                                                                |                                     |      |                                   |      |                                           |   |
| Metropolitan                                                                 | 219                                 | 21.8 | 2,088                             | 21.5 | -                                         | - |
| Urban area                                                                   | 386                                 | 38.5 | 3,774                             | 38.9 | -                                         | - |
| Rural area                                                                   | 399                                 | 39.7 | 3,848                             | 39.6 | -                                         | - |
| <b>Respiratory conditions within 12 months prior to index date</b>           |                                     |      |                                   |      |                                           |   |
| Asthma                                                                       | 371                                 | 37.0 | 577                               | 5.9  | <b>4.59 (3.86–5.45)</b>                   |   |
| COPD                                                                         | 106                                 | 10.6 | 129                               | 1.3  | <b>1.56 (1.19–2.05)</b>                   |   |
| <b>Pertussis-like clinical conditions within 30 days prior to index date</b> |                                     |      |                                   |      |                                           |   |
| Acute bronchitis                                                             | 464                                 | 46.2 | 339                               | 3.5  | <b>14.66 (11.83–18.16)</b>                |   |
| Allergic rhinitis                                                            | 401                                 | 39.9 | 323                               | 3.3  | <b>3.24 (2.63–4.00)</b>                   |   |
| Pneumonia                                                                    | 169                                 | 16.8 | 27                                | 0.3  | <b>13.15 (8.89–19.45)</b>                 |   |
| URTI                                                                         | 438                                 | 43.6 | 468                               | 4.8  | 1.07 (0.86–1.31)                          |   |
| <b>Other medical conditions within 12 months prior to index date</b>         |                                     |      |                                   |      |                                           |   |
| Cancer                                                                       | 97                                  | 9.7  | 297                               | 3.1  | <b>1.70 (1.43–2.01)</b>                   |   |
| Cardiovascular disease                                                       | 381                                 | 38.0 | 1,281                             | 13.2 | 1.19 (0.93–1.53)                          |   |
| Cerebrovascular disease                                                      | 121                                 | 12.1 | 493                               | 5.1  | <b>1.77 (1.29–2.44)</b>                   |   |
| Diabetes                                                                     | 296                                 | 29.5 | 1,260                             | 13.0 | 1.02 (0.85–1.21)                          |   |
| GERD                                                                         | 542                                 | 54.0 | 1,365                             | 14.1 | <b>3.28 (2.83–3.81)</b>                   |   |
| Hyperlipidemia                                                               | 482                                 | 48.0 | 1,867                             | 19.2 | <b>2.07 (1.77–2.42)</b>                   |   |
| Hypertension                                                                 | 494                                 | 49.2 | 2,557                             | 26.3 | 0.70 (0.60–0.82)                          |   |
| Autoimmune disease                                                           | 495                                 | 49.3 | 1,703                             | 17.5 | <b>2.08 (1.79–2.42)</b>                   |   |
| Liver disease                                                                | 324                                 | 32.3 | 1,134                             | 11.7 | <b>2.79 (2.33–3.33)</b>                   |   |
| Renal disease                                                                | 96                                  | 9.6  | 300                               | 3.1  | <b>1.89 (1.40–2.55)</b>                   |   |
| <b>Co-medications within 12 months prior to index date</b>                   |                                     |      |                                   |      |                                           |   |
| Immunosuppressive drugs (excluding corticosteroids)                          | 25                                  | 2.5  | 43                                | 0.4  | 1.37 (0.78–2.42)                          |   |

Each pertussis case was matched up to 10 controls by age group, sex, and geographic region at index date. [a] Among 1,011 cases, 7 cases were not matched with at least one control. [b] Due to limited available data period of NHIS-NSC, controls in 2015 were matched with the cases diagnosed between 2015 and 2018. [c] Separate multivariate models adjusted for comorbidities and co-medications assessed within 12 months prior to index date, and pertussis-like clinical conditions assessed within 30 days prior to index date. CI: confidence interval; COPD: chronic obstructive pulmonary disease; GERD: gastroesophageal reflux disease; NHIS-NSC: National Health Insurance Service – National Sample Cohort; SD: standard deviation; URTI: upper respiratory tract infection.
